# Supplementary material for: Formal nomenclature and description of cryptic species of the Encyrtus sasakii complex (Hymenoptera: Encyrtidae)
Source: Springer Nature journal article supplement (doi:10.1038/srep34372), 2016-10-04
Supplement: 41598_2016_BFsrep34372_MOESM4_ESM.pdf [file 41598_2016_BFsrep34372_MOESM4_ESM.pdf]

**Formal nomenclature and description of cryptic species of the *Encyrtus sasakii* complex (Hymenoptera: Encyrtidae)**

Ying Wang<sup>1</sup>, Qing-Song Zhou<sup>1,2</sup>, Hui-Jie Qiao<sup>1</sup>, Ai-Bing Zhang<sup>3</sup>, Fang Yu<sup>1,2</sup>, Xu-Bo Wang<sup>4</sup>, Chao-Dong Zhu<sup>1,2</sup>, Yan-Zhou Zhang<sup>1,2\*</sup>

*1 Key Laboratory of Zoological Systematics and Evolution, Institute of Zoology, Chinese Academy of Sciences, Beijing 100101, China*

*2 University of Chinese Academy of Sciences (UCAS), No. 19A Yuquan Road, Beijing 100049, China*

*3 College of Life Sciences, Capital Normal University, Beijing 100048, China*

*4 Key Laboratory for Silviculture and Conservation of Ministry of Education, Beijing Forestry University, Beijing 100083, China*

*\* Corresponding author E-mail: [zhangyz@ioz.ac.cn](mailto:zhangyz@ioz.ac.cn)*

Authors Ying Wang and Qing-Song Zhou contributed equally to this study.

## Text File S1

### Description of *Encyrtus* species

#### *Encyrtus eulecaniumiae* sp. nov. Wang & Zhang, Figure 6

##### Description.

Female (Holotype): Length about 3 mm including ovipositor sheaths. Head black in ocellar area, from anterior ocellus to top of scrobes black to brown yellow, and malar space area brown; face largely brown yellow; radicle brown mixed pale orange; scape (Figure 6a) mostly pale brown; pedicel dark brown or black; funicle with segments black; clava black; pronotum dark brown, laterally brown; thorax clothed in setae which dark brown, mesoscutum mostly black, laterally brown, scutellum black but a broad transverse yellow band on the scutellum, with a tuft of black bristles on the tip; metanotum black; tegula brown; mesopleuron pale brown; fore and hind coxae brown yellow; mid coxa mostly brown; legs otherwise brown; basal one third of fore wing hyaline, and the others infuscate, fore wing with a group of long bristles just below the apical third of the submarginal; propodeum brown dorsally, yellowish brown laterally; gaster black.

Head. In dorsal view, frontovertex about half head width; ocelli forming an obtuse angle about 120°; in front view, scrobal depression  $\cap$ -shaped; eye at least superficially bare; torulus separated from mouth margin by about one its own length; torulus separated from each other by about 4× own diameter. Antenna (Figure 6a) 13-segmented, scape cylindrical and 4.5× as long as broad; but approximate ratio of

segments from pedicel = 101: 98: 85: 81: 82: 78: 76: 87: 56: 47; F1 about 1.4× longer than wide, F2 a little longer than wide, F3 and F4 as long as wide, the last two a little wider than long; clava compact 3-segmented with transverse sutures; clypeus with three to six of conspicuous, long, suberect setae; maxillary and labial palpi 4 and 3 segmented respectively.

Thorax. Pronotum in dorsal view about one-sixth length of mesoscutum with surface sloping from posterior margin, uniformly setose and fine reticulate sculpture. Mesoscutum about 1.47× wider than long; uniformly convex, setose and fine reticulate sculpture, without notauli. Scutellum with a tuft of black bristles on the tip. Side of propodeum more or less naked below spiracle, but with a few inconspicuous, translucent setae on posterior margin above hind coxa. mesotibia with strong setae apically, but without differentiated rows of spines, and with mesotibial spur only about 1.7× as long as apical width of tibia (Figure 6e); each leg with basitarsus robust and longest, the others equal in size; the basitarsus of mesotarsus about 2× as long as wide and about as long as remaining segments. Fore wing (Figure 6c) hyaline and distinctly infuscate in the apical two-thirds; a fuscous dot below the apical two-third of the submarginal vein and robust bristle on the fuscous area. SM: MV: STV: PMV = 72:5:25:23; stigmal vein apically curved.

Gaster. Gaster very broadly sessile, with seven visible, uniformly gastral tergites; hypopygium very nearly reaching apex of gaster. Ovipositor sheaths yellow, apex one-third dark brown (Figure 6b).

Relative measurements: HW 96, FV 46, POL, 33, AOL 19, OOL 6, OCL 7, POD 5,

AOD 4, EL 58, EW 38, MS 30, SL 32, SW 7, FWL 204, FWW 83; HWL 169, HWW 53, OL 34, [MT 91]

Male: generally similar to female but for antennal structure and genitalia; yellow band on the scutellum obviously smaller than female.

***Encyrtus rhodococcusiae* sp. nov. Wang & Zhang, Figure 7**

**Description.**

Female (Holotype): Length including ovipositor 1.9 mm. Head black in ocellar area, frontovertex black; malar space area brown; antenna with scape yellow-brown; pedicel and flagellum dark brown; maxillary and labial palpi yellow-brown; pronotum dark brown to black, laterally brown; thorax clothed in setae which dark brown, mesoscutum mostly black, laterally brown, scutellum black but a broad transverse yellow band on the scutellum, with a tuft of black bristles on the tip; metanotum dark brown; tegula dark brown; mesopleuron pale brown; fore and hind coxae pale brown yellow (Figure 7d, f); mid coxa mostly brown (Figure 7e); legs otherwise brown; basal one third of fore wing hyaline, and the others infusate, fore wing with a group of long bristles just below the apical third of the submarginal; propodeum brown dorsally, yellowish brown laterally; gaster black.

Head. In dorsal view, frontovertex about half head width; ocelli forming an obtuse angle about 120°; in front view, scrobes quite shallow and  $\cap$ -shaped; eye at least superficially bare; torulus separated from mouth margin by about one its own length; torulus separated from each other by about 2.5× own diameter; antenna with scape

subcylindrical, 3.4× as long as broad; pedicel subtriangular, as broad as scape, 1.4× as long as broad. Antenna (Figure 7a) 13-segmented, scape cylindrical but approximate ratio of segments from pedicel = 70: 65: 55: 61:57: 55: 50: 64: 37: 32; ratio of length and width for each funicle segment: 1.3, 1, 1.02, 0.84, 0.75, 0.63; clava 3-segmented similar to *E. eulecaniumiae*, its apex with a distinctly truncation; mandible plow shaped; clypeus also with three to six conspicuous, long, suberect setae; maxillary and labial palpi 4 and 3 segmented respectively.

Thorax. Mesoscutum about 1.44× wider than long; uniformly convex, setose and fine reticulate sculpture, without notauli. Pronotum very short, about one eleventh as long as mesoscutum, with polygonal reticulate sculpture; scutellum about 1.2× as long as broad, sculpture anteriorly similar to that of mesoscutum; fore wing (Figure 7c) about 2.3× as long as broad; costal cell with more than one line of setae dorsally; SM: MV: STV: PMV = 85:5:35:32; stigma vein apically curved.

Gaster. Hypopygium very nearly reaching apex of gaster. Ovipositor sheaths yellow, apex one-third dark brown (Figure 7b).

Relative measurements: HW 93, FV 46, POL, 33, AOL 19, OOL 8, OCL 5, POD 7, AOD 6, EL 50, EW 30, MS 31, SL 31, SW 9, FWL 162, FWW 61; HWL 116, HWW 35, OL28, [MT 69]

Male: generally similar to female but for antennal structure and genitalia; yellow band on the scutellum obviously smaller than female.

***Encyrtus sasakii* Ishii, Figure 8**

**Description.**

Female: Length including ovipositor 2.5 mm. Ocellar area and frontovertex black; malar space area brown; antenna with scape yellow-brown; pedicel and flagellum in dorsal aspect dark brown; maxillary and labial palpi yellow-brown; pronotum black, only laterally brown; thorax clothed in setae which black, mesoscutum mostly black, laterally brown, scutellum black but a broad transverse yellow band on the scutellum, with a tuft of black bristles on the apex of scutellum; metanotum dark brown; tegula dark brown; mesopleuron brown; fore coxa pale brown (Figure 8d), mid and hind coxae mostly brown (Figure 8e, f), legs otherwise brown; basal one third of fore wing hyaline, and the others infusate, fore wing with a group of long bristles just below the apical third of the submarginal; propodeum brown dorsally, yellowish brown laterally; gaster black.

Head. In dorsal view, frontovertex about half head width; ocelli forming an obtuse angle about 120°; in front view, scrobes broadly  $\cap$ -shaped; torulus separated from mouth margin very slightly less than its own length; torulus separated from each other by about 2.0× own diameter; antenna with scape subcylindrical, 4.7× as long as broad; pedicel subtriangular, as broad as scape, 1.7× as long as broad. Antenna (Figure 8a) 13-segmented, scape cylindrical but approximate ratio of segments from pedicel= 85: 90: 81: 75:73: 64: 65: 65: 50: 44; ratio of length and width for each funicle segment: 1.55, 1.25, 1.07, 0.97, 0.77, 0.72; clava 3-segmented, its apex with a distinctly truncation; mandible plow shaped; clypeus also with four conspicuous, long, suberect

setae; maxillary and labial palpi 4 and 3 segmented respectively.

Thorax. Mesoscutum about 1.60× wider than long; uniformly convex, setose and fine reticulate sculpture, without notauli. Pronotum very short, about one fifth as long as mesoscutum, with polygonal reticulate sculpture; scutellum about 1.23× as long as broad, sculpture anteriorly similar to that of mesoscutum; fore wing (Figure 8c) about 2.44× as long as broad; costal cell with more than one line of setae dorsally; SM: MV: STV: PMV = 96:7:37:37; stigmal vein apically curved.

Gaster. Hypopygium nearly reaching apex of gaster. Ovipositor sheaths yellow, apex one-third dark brown (Figure 8b).

Relative measurements: HW 101, FV 48, POL, 40, AOL 24, OOL 7, OCL 8, POD 6, AOD 8, EL 60, EW 41, MS 30, SL 40, SW 8, FWL 230, FWW 94; HWL 170, HWW 69, OL37 [MT 102] .

Male: generally similar to female but for antennal structure and genitalia; yellow band on the scutellum obviously smaller than female.







BJEG2 BJEG2 + + Beijing, Haidian 2006-v-1 YZZ *Rhodococcus sariuoni* *Sophora japonica*

---

Note: (+: extracted information in the study; Old Code: all the sample we list in the Chesters et al., 2012)



Table S3 Shape PCA components

|                        | shape_PC1 | shape_PC2 | shape_PC3 | shape_PC4 | shape_PC5 | shape_PC6 | shape_PC7 | shape_PC8 | shape_PC9 | shape_PC10 | shape_PC11 | shape_PC12 | shape_PC13 | shape_PC14 | shape_PC15 | shape_PC16 | shape_PC17 | shape_PC18 | shape_PC19 | shape_PC20 | shape_PC21 | shape_PC22 | shape_PC23 | shape_PC24 | shape_PC25 |
|------------------------|-----------|-----------|-----------|-----------|-----------|-----------|-----------|-----------|-----------|------------|------------|------------|------------|------------|------------|------------|------------|------------|------------|------------|------------|------------|------------|------------|------------|
| Variance               | 0.034     | 0.0169    | 0.0111    | 0.0076    | 0.0064    | 0.0057    | 0.0054    | 0.0044    | 0.0036    | 0.0033     | 0.0032     | 0.0027     | 0.0022     | 0.0022     | 0.0019     | 0.0017     | 0.0015     | 0.0014     | 0.0012     | 0.0011     | 0.0009     | 0.0006     | 0.0004     | 4.00E-04   | 0          |
| Proportion of Variance | 0.2829    | 0.1406    | 0.0923    | 0.096     | 0.0534    | 0.0477    | 0.0452    | 0.0369    | 0.0303    | 0.0274     | 0.0266     | 0.0222     | 0.0183     | 0.018      | 0.0159     | 0.014      | 0.0121     | 0.0113     | 0.0098     | 0.0094     | 0.0075     | 0.0054     | 0.0036     | 3.00E-03   | 0          |
| Cumulative Proportion  | 0.2829    | 0.4235    | 0.5158    | 0.5819    | 0.6353    | 0.683     | 0.7282    | 0.7651    | 0.7954    | 0.8228     | 0.8494     | 0.8716     | 0.8899     | 0.9076     | 0.9238     | 0.9379     | 0.9499     | 0.9613     | 0.9711     | 0.9805     | 0.988      | 0.9934     | 0.997      | 1.00E+00   | 1          |

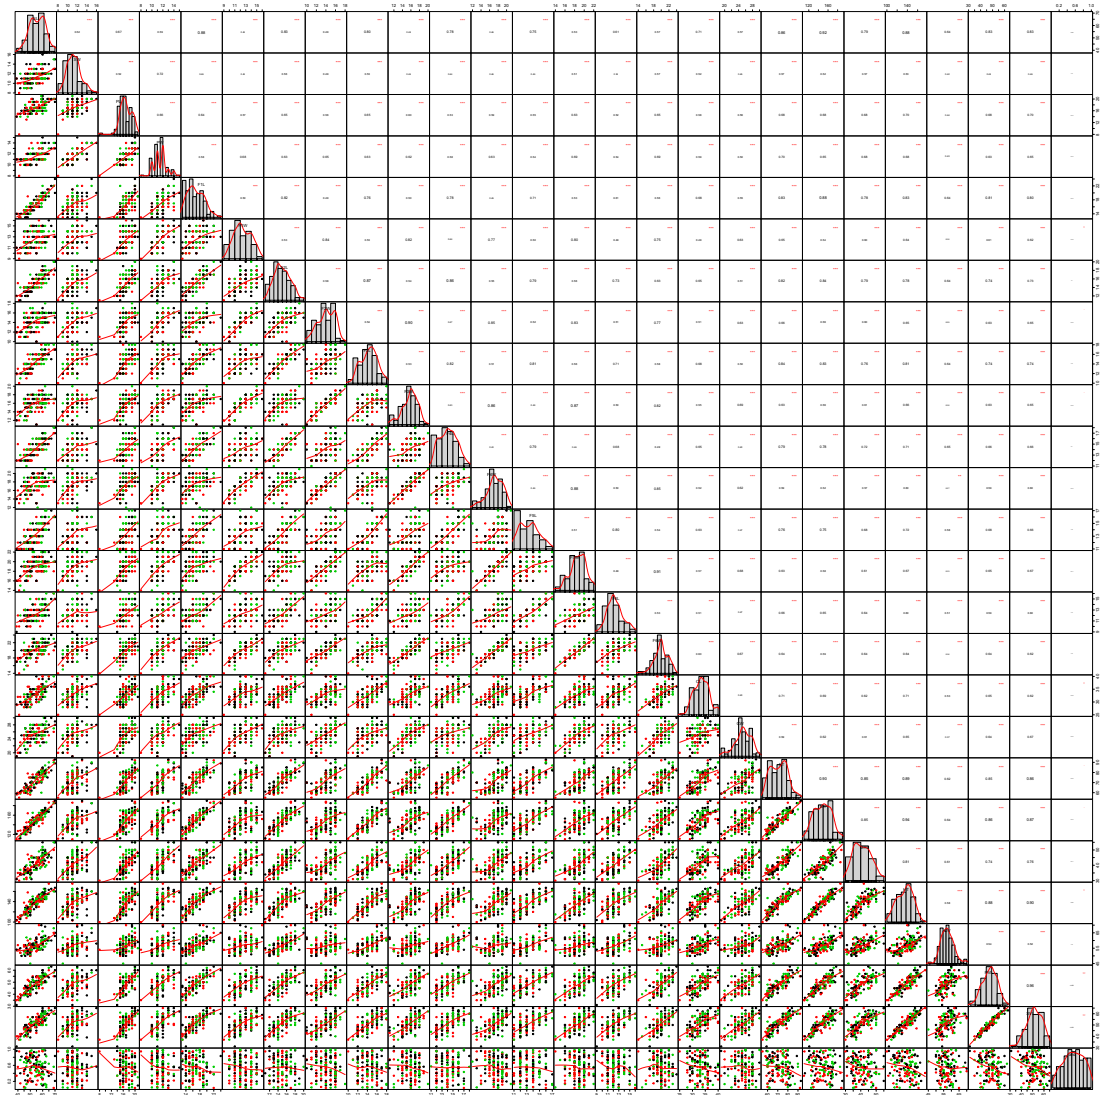

**Figure S1.** Matrix scatterplots and Pearson product-moment correlation coefficients of *Encyrtus* spp. based on 25 of the morphological characters.

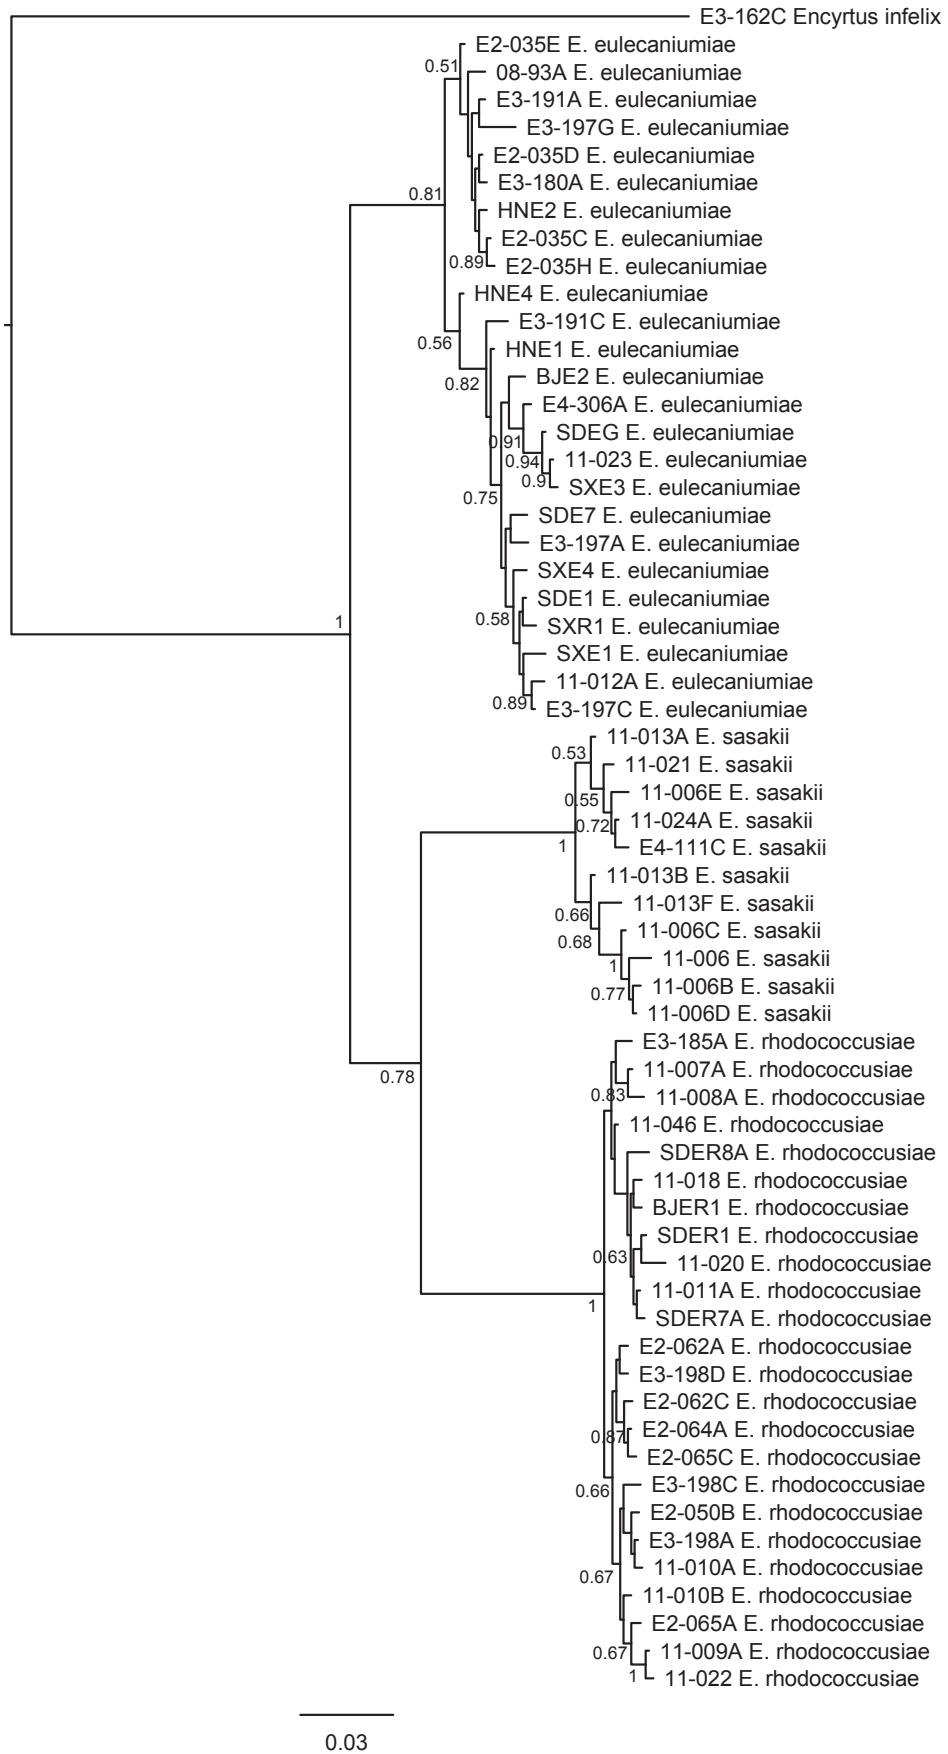

**Figure S2.** Bayesian inference phylogeny of *Encyrtus* spp. constructed by MrBayes based on COI dataset.

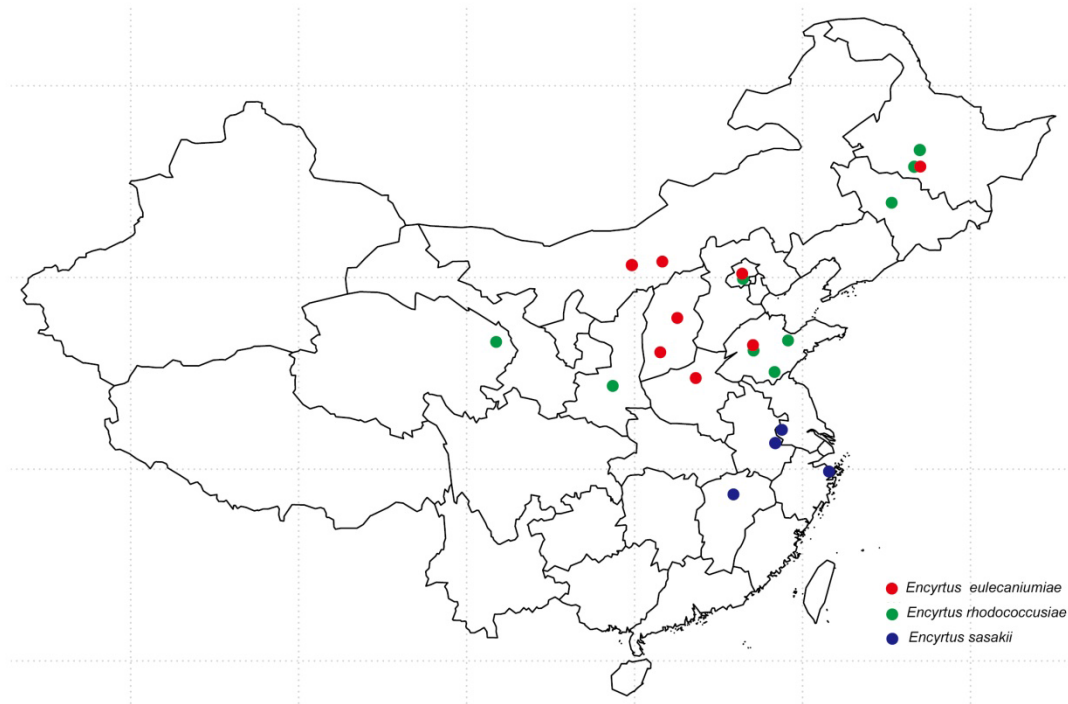

**Figure S3.** Sampling sites of *Encyrtus* spp. in China. This figure was drawn in “R” using the mapdata package created by R Development Core Team<sup>67</sup>, and the map will not have a copyright dispute.
